### 879 Establishing the First Eoe Deanery-Wide Trainee Led Virtual Journal Club: Keeping Up Morale by Encouraging Trainee Interaction and Continuous Professional Development During the Hiatus to Teaching Activities Enforced by Coronavirus

S. Adegbola<sup>1</sup>, M. Rabie<sup>2</sup>, C. Currow<sup>3</sup>, M. Aly<sup>4</sup>, K. Patel<sup>4</sup>, M. Aker<sup>5</sup>, K. Patel<sup>3</sup>, A. Askari<sup>3</sup>

<sup>1</sup>Lister Hospital, Stevenage, United Kingdom, <sup>2</sup>Norfolk and Norwich Hospital, Norfolk, United Kingdom, <sup>3</sup>Luton Hospital, Luton, United Kingdom, <sup>4</sup>Watford General Hospital, Watford, United Kingdom, <sup>5</sup>Petersborough Hospital, Petersborough, United Kingdom

**Introduction:** Over the initial COVID months and with the cancellation of several teaching programs / courses/ conferences; we identified a NEED for trainee interaction and continuous professional development, despite staff redeployments. We since established a deanery-wide trainee led VIRTUAL journal club, run by the Surgical Trainees of East of England Research collaborative (STEER) group.

**Method:** Following decision in May2020, the STEER group collated curriculum topics and related landmark papers, drafting a programmed-schedule for sessions (45mins – 1hour). CPD accreditation was sought and received from RCSEd prior to some sessions. Sessions were delivered using the Microsoft Teams app (via desktop/tablet/phone). Targeted audience included FYs, CTs, STs, JCFs, SCFs (candidates preparing for MRCS/FRCS or interested in academia). Live polling / feedback forms and attendance certificates were distributed.

**Results:** Six journal club sessions have been run to-date. A minimum of 15-20 participants attended each session with spread of junior/senior trainees. Sessions were video recorded for repeat playback for those unable to attend. Feedback was overwhelmingly positive, with good engagement from participants.

**Conclusions:** A deanery wide virtual journal club was positively received by trainees and benefits included: critique and dissemination of evidence (especially recently with COVID-related literature), trainee interaction and keeping up-to-date and understanding and analysing information.
